# Supplementary material
Source: publisher figshare collection journal article supplement (https://acs.figshare.com/ndownloader/files/3952531)
Supplement: Supplementary file 1 [file 3952531]

# Supporting Information

## Symmetry Lowering in Triindoles: Impact on the Electronic and Photophysical Properties

Constanza Ruiz, Eva M. Garcia-Frutos, Demetrio A. da Silva Filho, Juan T. López Navarrete,\*

M. Carmen Ruiz Delgado\* and Berta Gómez-Lor\*

\*E-mail: [bgl@icmm.csic.es](mailto:bgl@icmm.csic.es), [teodomiro@uma.es](mailto:teodomiro@uma.es); [carmenrd@uma.es](mailto:carmenrd@uma.es)

### Supporting Information

|                                                          | <b>Pag.</b>   |
|----------------------------------------------------------|---------------|
| <b>1. Characterization of compound 2c</b>                | <b>S2</b>     |
| <b>2. Absorption spectra</b>                             | <b>S3</b>     |
| <b>3. Cyclic Voltammetry Measurements</b>                | <b>S4</b>     |
| <b>4. Spectroelectrochemistry and chemical oxidation</b> | <b>S5-S8</b>  |
| <b>5. DFT calculations</b>                               | <b>S9-S23</b> |

## 1. Characterization of compound 2c

Characterization of 5,6,11-trioctyl-6,11-dihydro-5H-diindolo[2,3-a:2',3'-c]carbazole (**2c**).  $^1\text{H}$  NMR (200 MHz,  $\text{CDCl}_3$ ,  $\delta$ )  $\delta$  8.96 (d,  $J = 7.9\text{ Hz}$ , 1 H; ArH), 8.90 (d,  $J = 7.7\text{ Hz}$ , 1 H; ArH), 8.41 (d,  $J = 8.1\text{ Hz}$ , 1 H; ArH), 7.70-7.63 (m; 3H, ArH), 7.57-7.33(m, 6 H; ArH), 4.95 (t,  $J = 7.9\text{ Hz}$ , 2 H;  $\text{CH}_2$ ), 4.70 (t,  $J = 7.4\text{ Hz}$ , 2 H;  $\text{CH}_2$ ), 4.58 (t,  $J = 7.5\text{ Hz}$ , 2 H;  $\text{CH}_2$ ), 2.10 (m, 6 H;  $\text{CH}_2$ ), 1.47-0.82 (m, 30 H;  $\text{CH}_2$ ), 0.71 (m, 9 H;  $\text{CH}_3$ );  $^{13}\text{C}$  NMR (50 MHz,  $\text{CDCl}_3$ ,  $\delta$ ) 144.7, 143.3, 140.8, 133.8, 131.8, 127.0, 126.8, 125.2, 124.5, 124.1, 123.9, 123.5, 123.1, 122.7, 122.2, 120.3, 119.6, 119.0, 112.7, 112.5, 112.0, 109.8, 48.5, 48.0, 46.8, 31.7, 31.6, 31.5, 30.4, 29.7, 29.3, 29.2, 28.9, 28.8, 27.4, 27.0, 26.8, 26.6, 26.4, 22.6, 22.5, 14.1, 14.0; UV-vis ( $\text{CH}_2\text{Cl}_2$ , 25  $^\circ\text{C}$ ):  $\lambda_{\text{max}}$  ( $\epsilon$ ) = 263 (7447), 309 (7674), 343 (3219), 357 (4092), 390 (1681), 408 (1844) nm; MALDI-TOF MS  $m/z$  681 [ $\text{M}^+$ ], HRMS (MALDI-TOF) calcd for  $\text{C}_{48}\text{H}_{63}\text{N}_3$ : 681.50165, found: 681.50189.

## 2. Absorption spectra

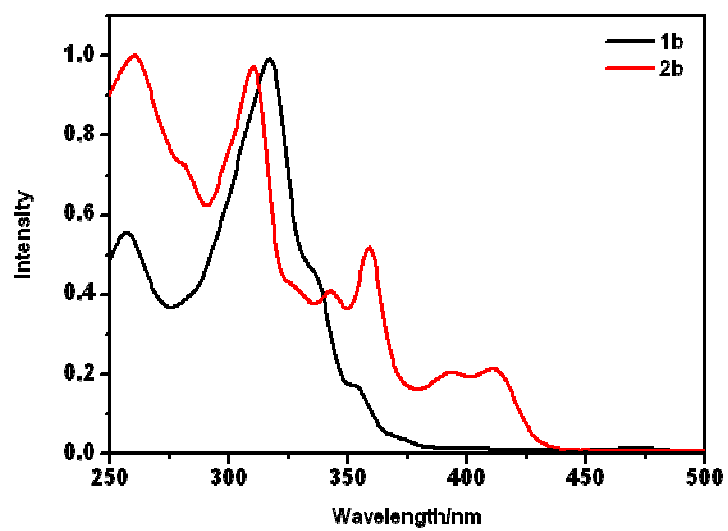

**Figure S1.** Experimental UV-Vis spectra of **1b** and **2b** in  $\text{CH}_2\text{Cl}_2$  solutions.

### 3. Cyclic Voltammetry Measurements

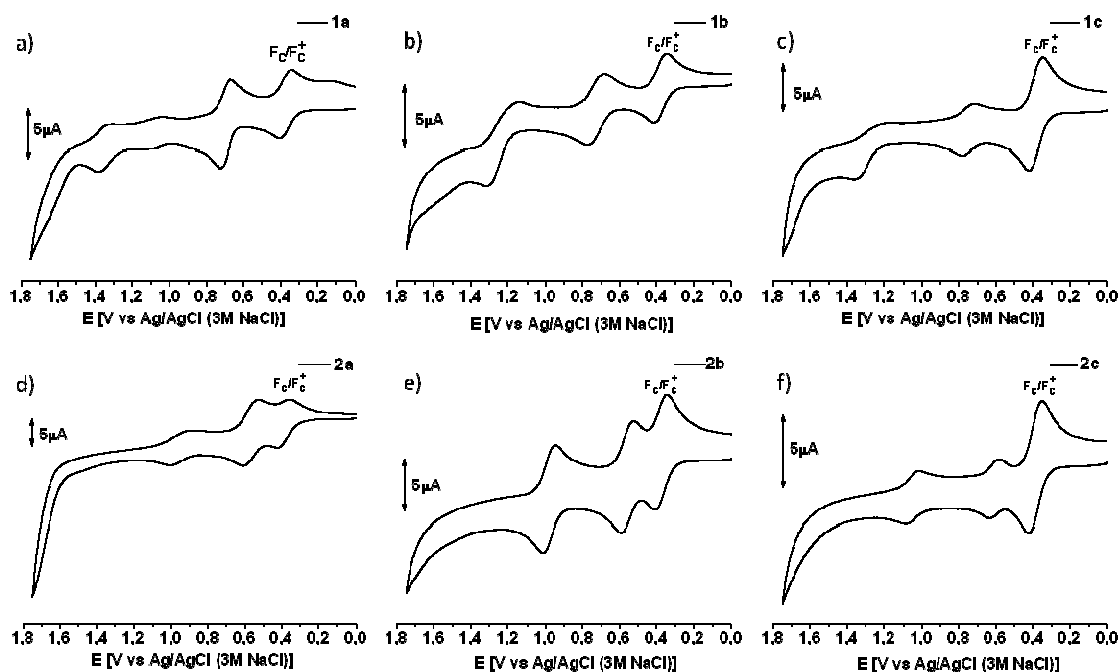

**Figure S2.** Cyclic voltammograms of **1a**, **1b**, **1c**, **2a**, **2b** and **2c** at  $c = 1 \times 10^{-3} \text{ mol L}^{-1}$  recorded in  $\text{CH}_3\text{CN}/0.1\text{M}$  tetra-*n*-butylammonium hexafluorophosphate ( $\text{TBAPF}_6$ ) measured versus  $\text{Ag}/\text{AgCl}$  (3M  $\text{NaCl}$ ) and containing ferrocene as internal standard. Measurements were performed at a scan rate  $100\text{mV/s}$  using a Pt working electrode and a Pt wire auxiliary electrode.

#### 4. Spectroelectrochemistry and chemical oxidation

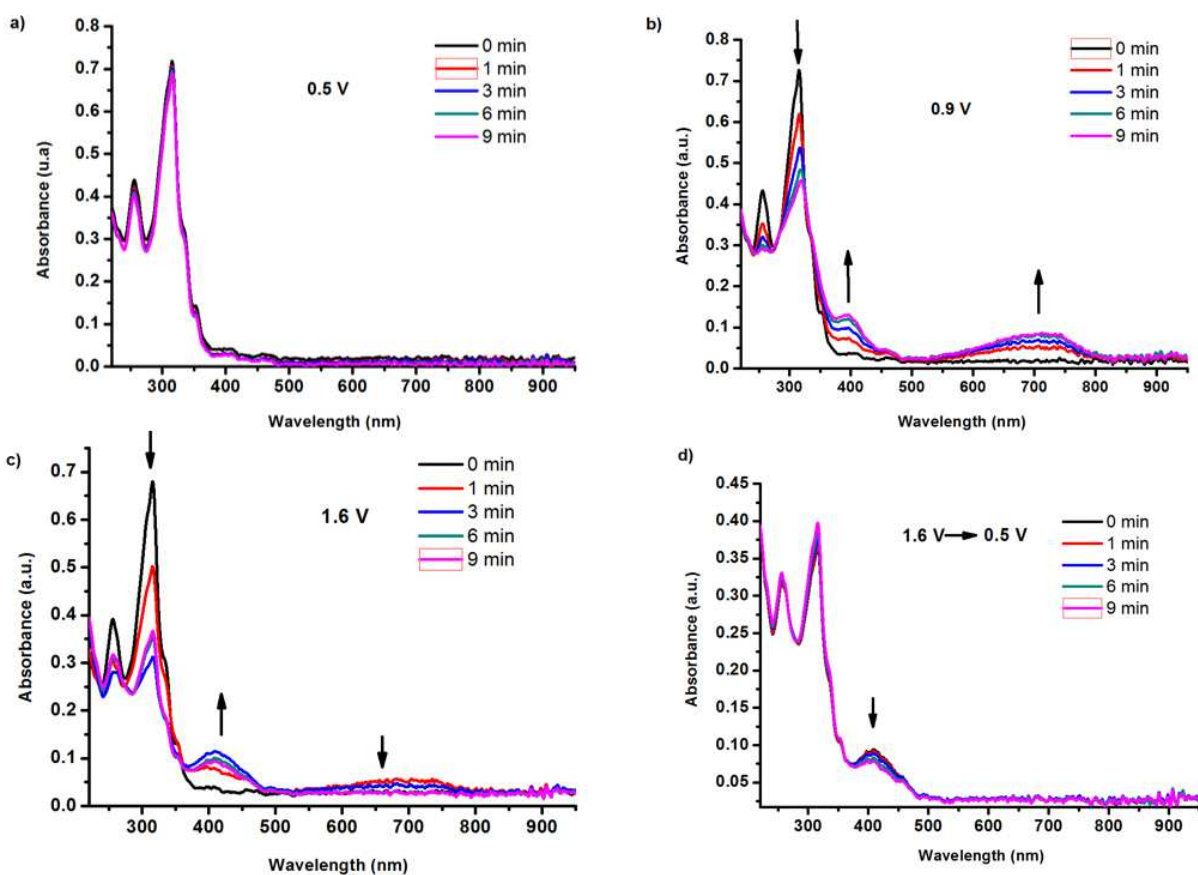

**Figure S3:** Spectroelectrochemistry of **1c** in acetonitrile solution containing 0.1 M  $\text{Bu}_4\text{NPF}_6$  as supporting electrolyte at a) 0.5 V, b) 0.9 V c) 1.6 V and d) recovery of the compound from 1.6 to 0.5 V.

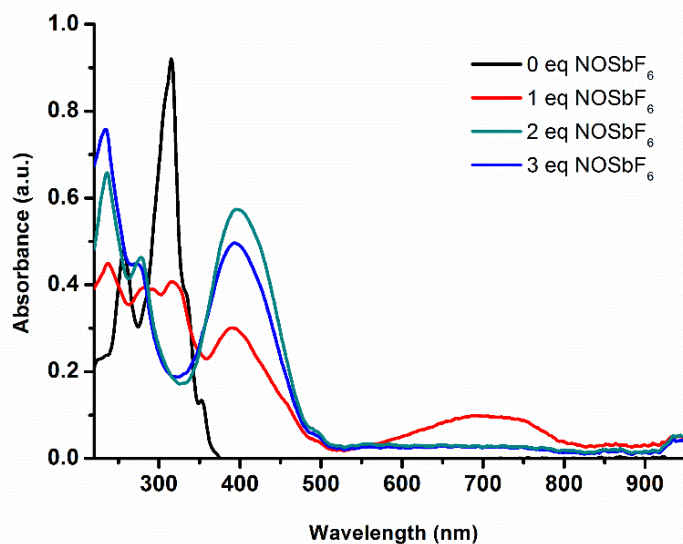

**Figure S4:** Chemical oxidation of **1c** in acetonitrile with different equivalent of NOSbF<sub>6</sub>.

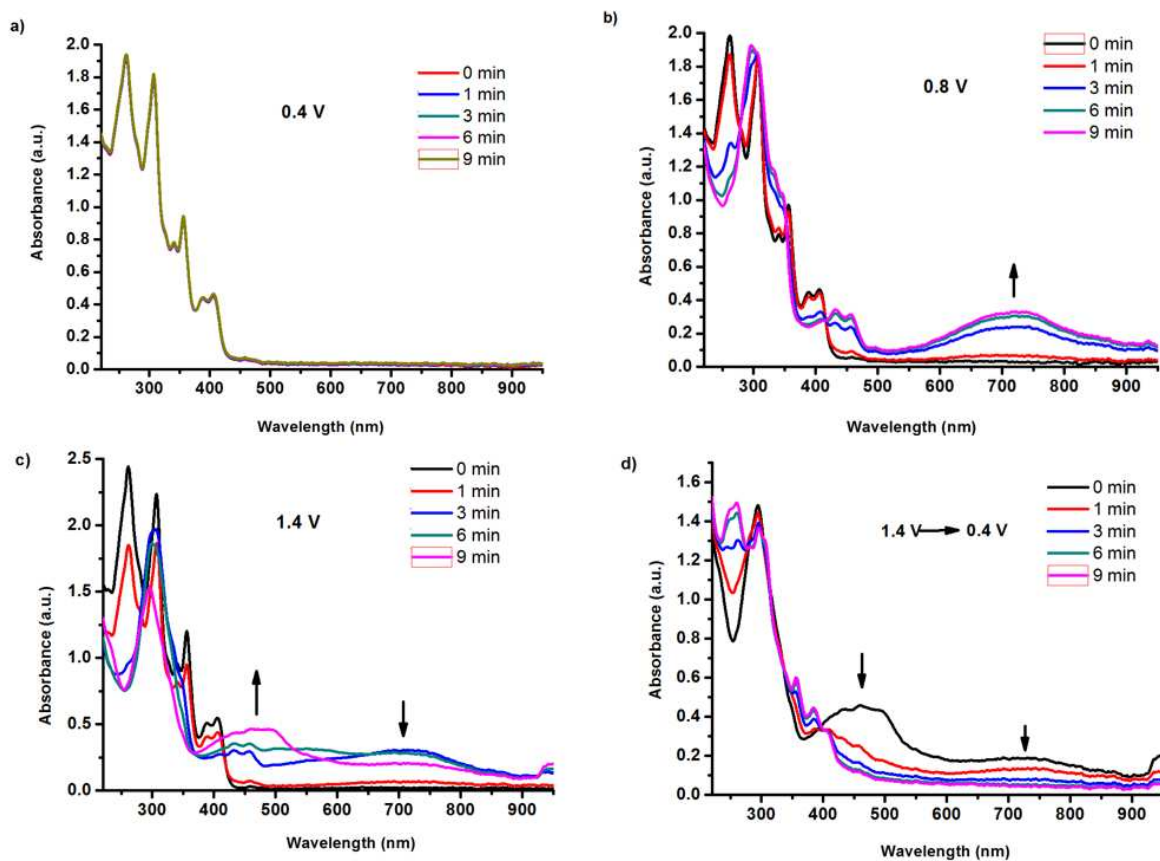

**Figure S5:** Spectroelectrochemistry of **2c** in acetonitrile solution containing 0.1 M Bu<sub>4</sub>NPF<sub>6</sub> as supporting electrolyte at a) 0.4 V, b) 0.8 V c) 1.4 V and d) recovery of the compound from 1.4 to 0.4 V.

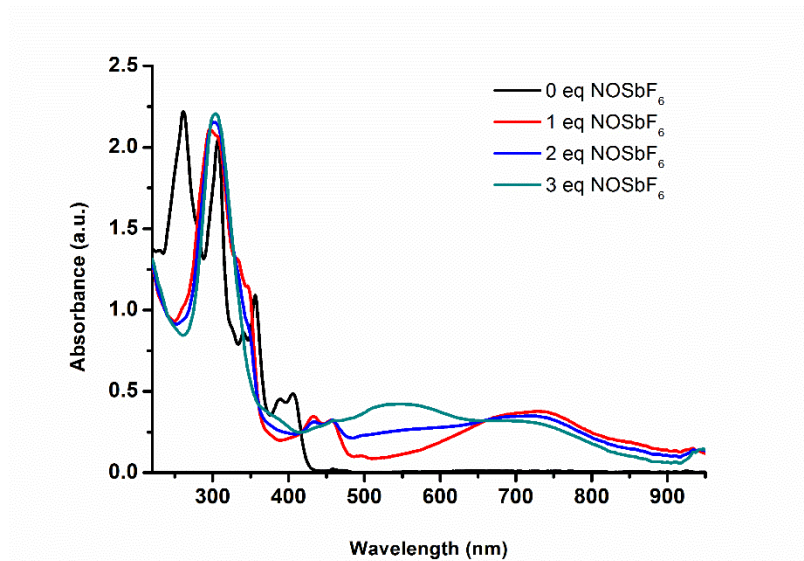

**Figure S6** Chemical oxidation of **2c** in acetonitrile with different equivalent of  $\text{NOSbF}_6$ .

## 5. DFT calculations

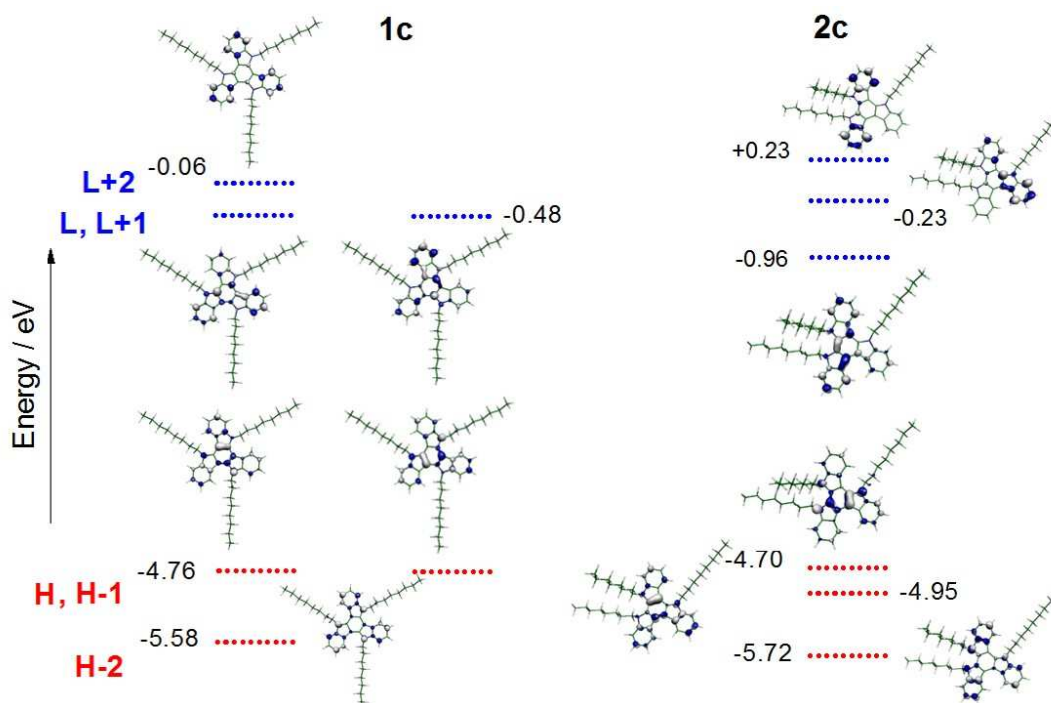

**Figure S7.** DFT//B3LYP/6-31G\*\* molecular orbital energies and topologies for **1c** and **2c**.

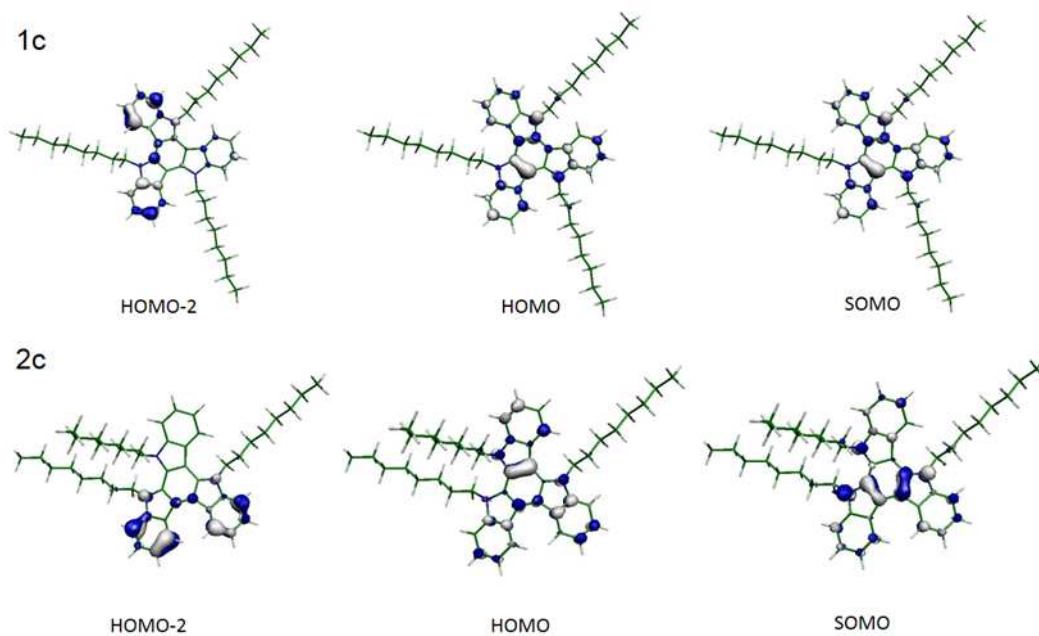

**Figure S8.** DFT// B3LYP/6-31G\*\* molecular orbitals involved in the orbital transitions associated with the optical bands of radical cation species of **1c** (top) and **2c** (bottom).

**Table S1.** Vertical transition energies and oscillator strengths (f) calculated using TD-DFT//B3LYP/6-31G\*\* for the **1b** and **2b** systems.

| compound               | TDDFT//B3LYP/6-31G**                         |                    |
|------------------------|----------------------------------------------|--------------------|
|                        | <i>Calculated<br/>Transition energy (eV)</i> | <i>description</i> |
| <b>1b</b>              | 4.02 (f=0.45)                                | H →L, H-1→L +1     |
|                        | 4.02 (f=0.45)                                | H-1 →L, H →L+1     |
|                        | 4.23 (f=0.16)                                | H →L+2             |
|                        | 4.23 (f=0.16)                                | H-2 →L+2           |
|                        | 4.89 (f=0.30)                                | H →L+5             |
|                        | 4.89 (f=0.30)                                | H-1 →L+5           |
| <b>1b<sup>•+</sup></b> | 1.11 (f=0.05)                                | H-1 →S             |
|                        | 1.83 (f=0.14)                                | H-2 →S             |
|                        | 3.96 (f=0.16)                                | H-1→L, H-9→S       |
| <b>1b<sup>+</sup></b>  | 1.29 (f=0.09)                                | H-1→L              |
|                        | 1.76 (f=0.10)                                | H-3→L, H-2→L       |
|                        | 2.17 (f=0.29)                                | H-2→L, H-3→L       |
| <b>2b<sup>+2</sup></b> | 3.21 (f=0.13)                                | H →L               |
|                        | 3.56 (f=0.21)                                | H-1→L              |
|                        | 3.99 (f=0.10)                                | H →L+1             |
|                        | 4.19 (f=0.10)                                | H-2 →L             |
|                        | 4.29 (f=0.27)                                | H-2 →L, H-1→L+1    |
|                        | 4.34 (f=0.28)                                | H →L+2             |
|                        | 4.79 (f=0.16)                                | H →L+4             |
|                        | 4.93 (f=0.40)                                | H →L+5             |
| <b>2b<sup>•+</sup></b> | 1.42 (f=0.06)                                | H-1 →S             |
|                        | 1.73 (f=0.10)                                | H-2 →S             |
|                        | 3.85 (f=0.22)                                | H→L                |
| <b>2b<sup>+2</sup></b> | 1.57 (f=0.15)                                | H-1→L              |
|                        | 2.00 (f=0.17)                                | H-2→L              |
|                        | 2.16 (f=0.08)                                | H-4→L              |
|                        | 2.65 (f=0.05)                                | H-5→L              |



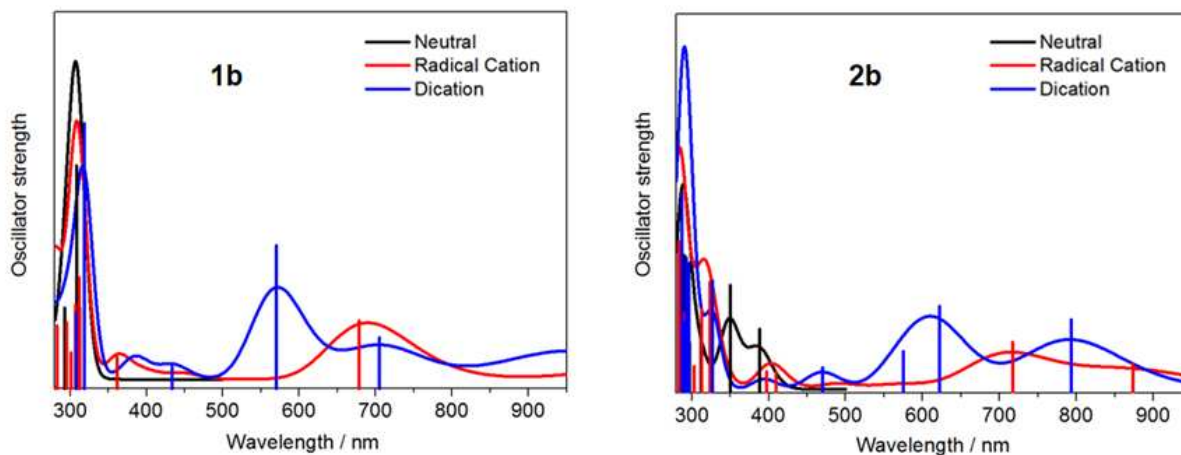

**Figure S9.** Simulated absorption spectra for **1b** (left) and **2b** (right) in the neutral, cation and dication states together with the TD-DFT//B3LYP/6-31G\*\* excitations (wavelength vs. oscillator strength) shown as vertical bars.

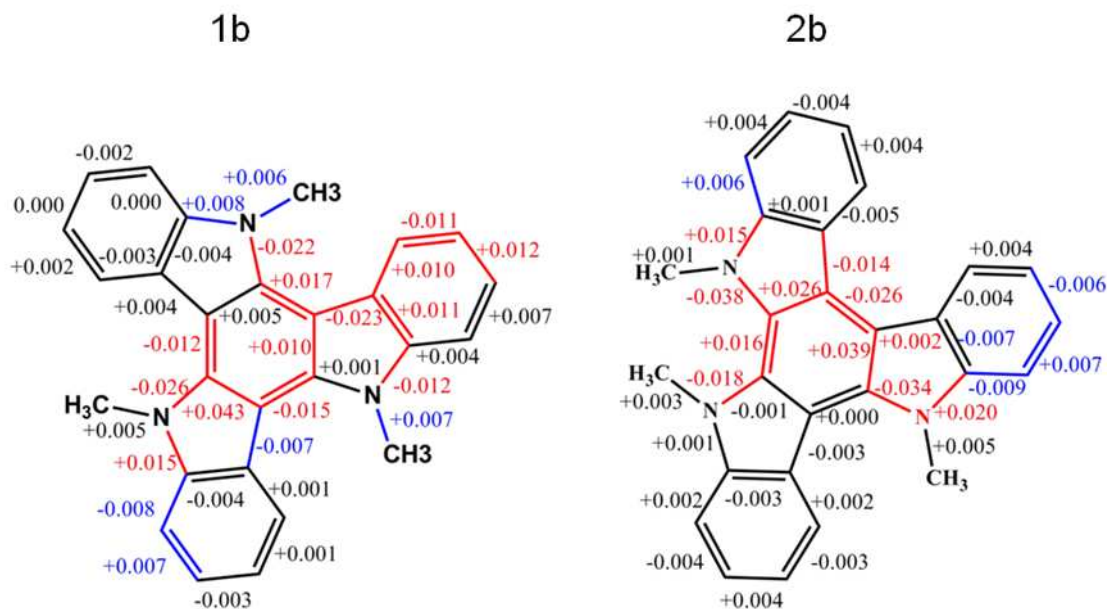

**Figure S10.** DFT-B3LYP/6-31G\*\* calculated bond-length modifications (Å) for **1b** and **2b** molecules upon oxidation. The bond length modifications ( $\Delta x$ ) larger than 0.010 Å are highlighted in red and those highlighted in blue corresponds to 0.005 Å  $< \Delta x < 0.010$  Å.

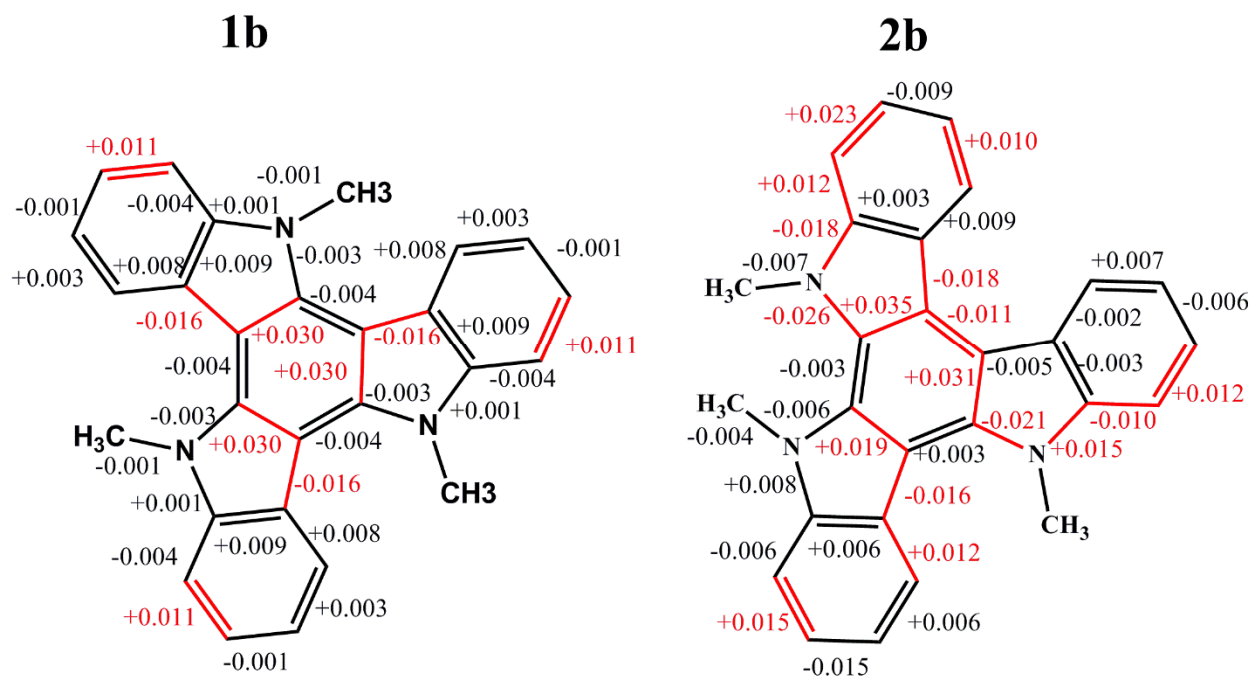

**Figure S11.** DFT-B3LYP/6-31G\*\* calculated bond-length modifications (Å) for **1b** and **2b** molecules upon going from the  $S_0$  ground state to the  $S_1$  excited state. The bond length modifications ( $\Delta x$ ) larger than 0.010 Å are highlighted in red.

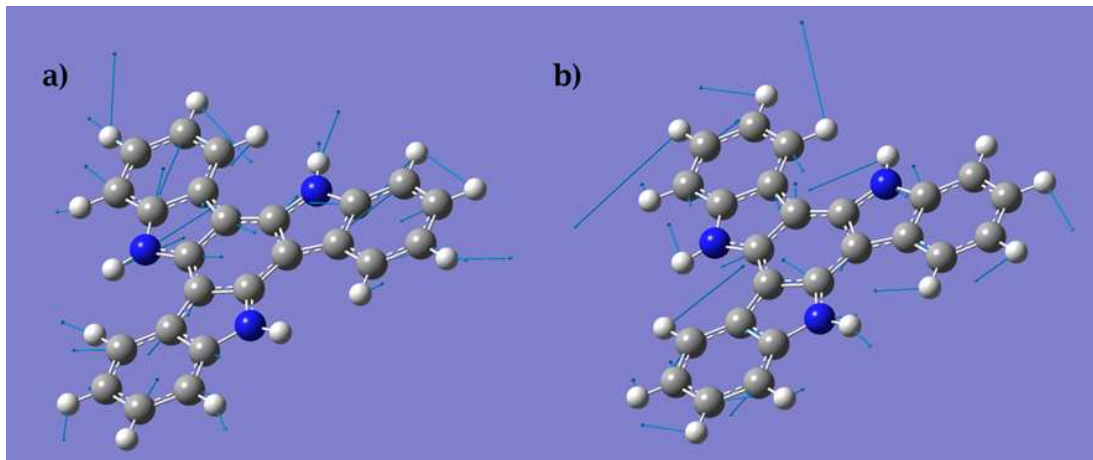

**Figure S12.** Representation of the **1a** 632 cm<sup>-1</sup> (a) mode and 1330 cm<sup>-1</sup> (b)  $S_1$  modes presented on Table S3.

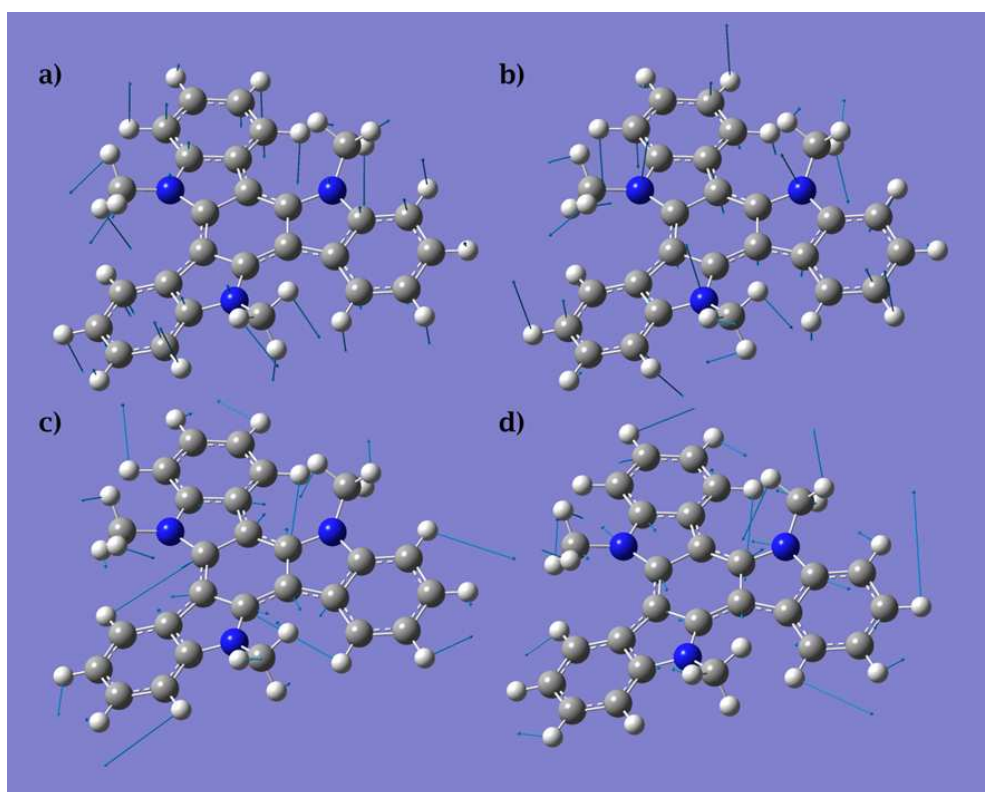

**Figure S13.** Representation of the **1b** 120  $\text{cm}^{-1}$  (a), 333  $\text{cm}^{-1}$  (b), 1243  $\text{cm}^{-1}$  (c) and 1340  $\text{cm}^{-1}$  (d)  $\mathbf{S}_1$  modes presented in table S4.

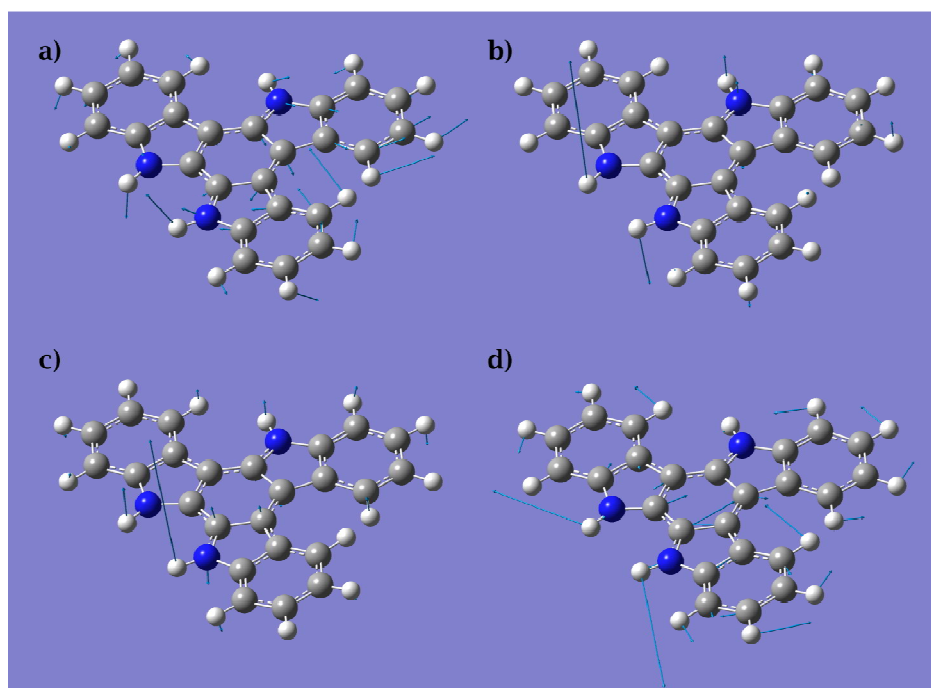

**Figure S14.** Representation of the **2a** 243  $\text{cm}^{-1}$  (a), 293  $\text{cm}^{-1}$  (b), 397  $\text{cm}^{-1}$  (c) and 1329  $\text{cm}^{-1}$  (d)  $\mathbf{S}_1$  modes presented in Table S5.

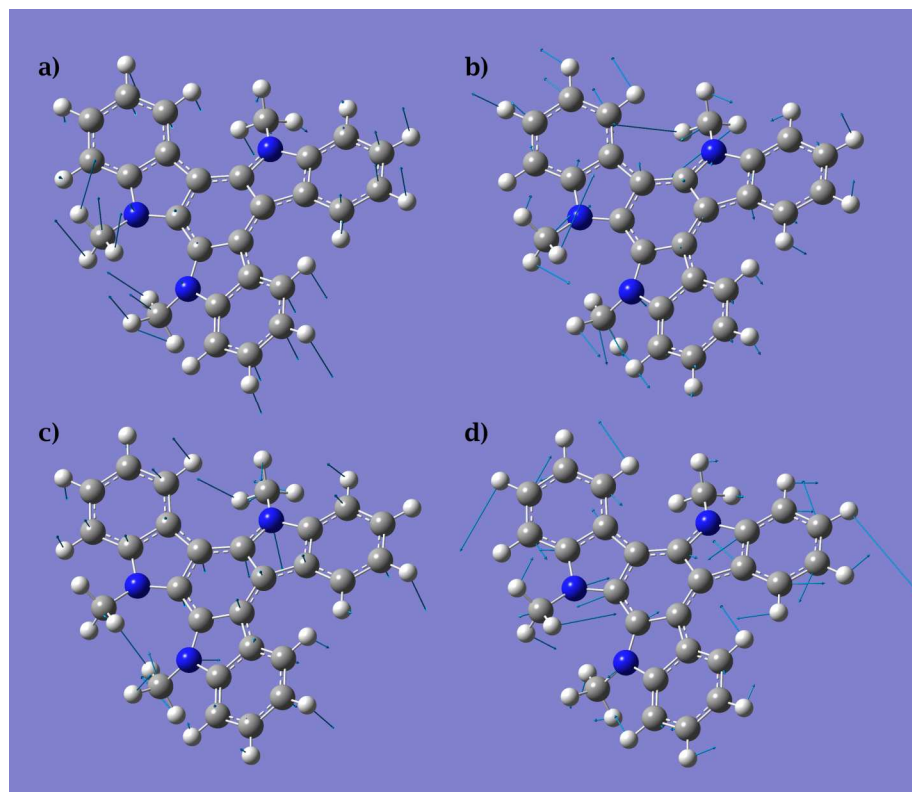

**Figure S15.** Representation of the **2b** 39 cm<sup>-1</sup> (a), 262 cm<sup>-1</sup> (b), 303 cm<sup>-1</sup> (c) and 1394 cm<sup>-1</sup> (d) **S<sub>1</sub>** modes presented in table S6.

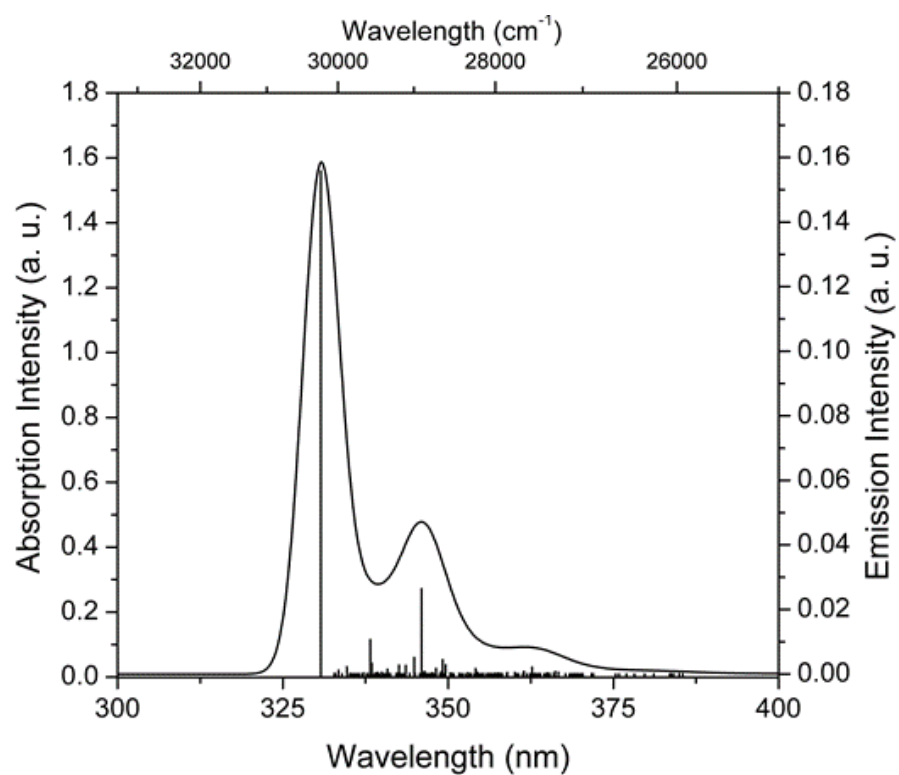

**Figure S16.** Emission ( $S_1 \rightarrow S_0$ ) vibrational progression of **1a** together with the transitions with intensities larger than 1E-5.

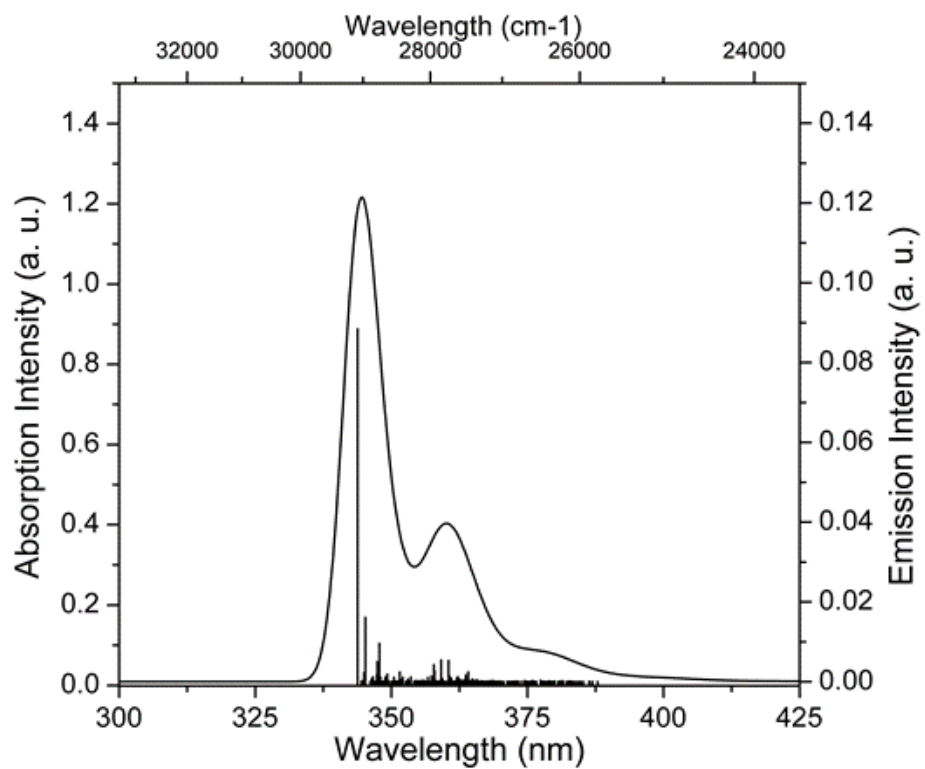

**Figure S17.** Emission ( $S_1 \rightarrow S_0$ ) vibrational progression of **1b** together with the transitions with intensities larger than 1E-5.

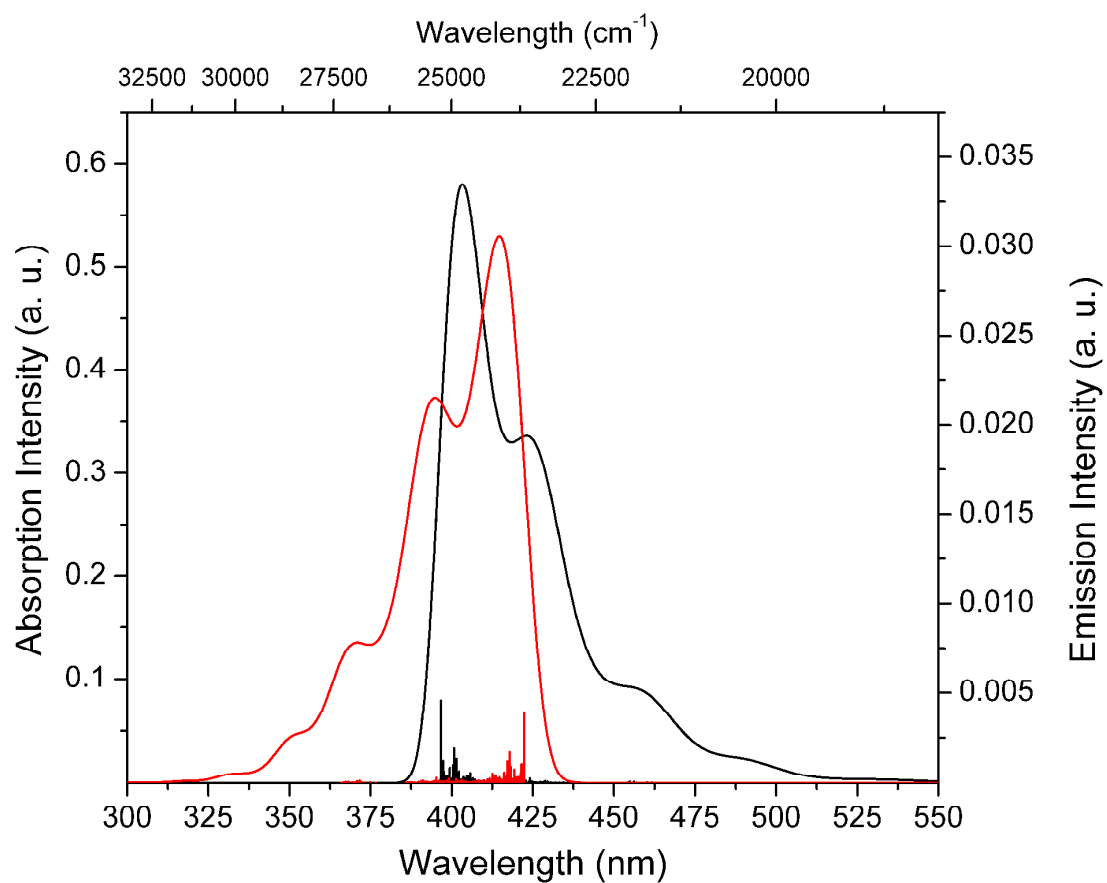

**Figure S18.** Absorption ( $S_0 \rightarrow S_1$ ) (red) and emission ( $S_1 \rightarrow S_0$ ) (black) vibrational progression of **2a** together with the transitions with intensities larger than 1E-5.



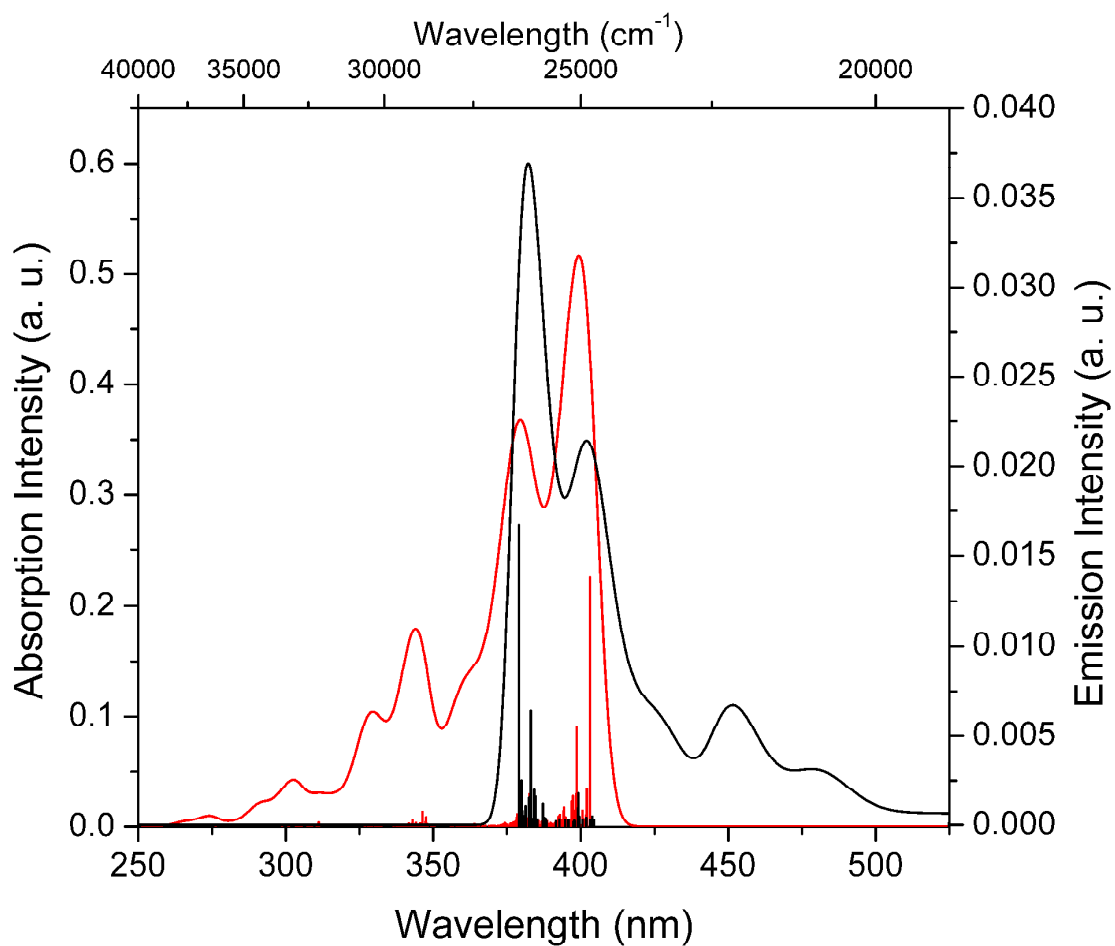

**Figure S19.** Absorption ( $S_0 \rightarrow S_1$ ) (red) and emission ( $S_1 \rightarrow S_0$ ) (black) vibrational progression of **2b** together with the transitions with intensities larger than  $1\text{E-}5$ .

**Table S2.**  $S_1 \rightarrow S_0$  relaxation energies computed by subtracting the ground state energy at the  $S_1$  geometry and the ground state energy at the optimized ground state geometry.

| compound  | DFT//B3LYP/6-31G**              |
|-----------|---------------------------------|
|           | $E_{S_1 \rightarrow S_0}$ (meV) |
| <b>1a</b> | 67                              |
| <b>1b</b> | 80                              |
| <b>2a</b> | 143                             |
| <b>2b</b> | 177                             |

**Table S3.** Frequency, S (Huang-Rhys) factor and corresponding relaxation energy for **1a** emission. Only modes with S larger than 0.1 are presented.

| Frequency           | S   | $\lambda$ |
|---------------------|-----|-----------|
| (cm <sup>-1</sup> ) |     | (meV)     |
| 632                 | 0.1 | 5         |
| 1330                | 0.2 | 34        |

**Table S4.** Frequency, S (Huang-Rhys) factor and corresponding relaxation energy for **1b** emission. Only modes with S larger than 0.1 are presented.

| Frequency (cm <sup>-1</sup> ) | S   | $\lambda$ (meV) |
|-------------------------------|-----|-----------------|
| 120                           | 0.2 | 3               |
| 303                           | 0.1 | 2               |
| 333                           | 0.1 | 5               |
| 1149                          | 0.1 | 10              |
| 1243                          | 0.1 | 15              |
| 1340                          | 0.1 | 12              |

**Table S5.** Frequency, S (Huang-Rhys) factor and corresponding relaxation energy for **2a** emission. Only modes with S larger than 0.1 are presented.

| Frequency (cm <sup>-1</sup> ) | S   | $\lambda$ (meV) |
|-------------------------------|-----|-----------------|
| 69                            | 0.1 | 1               |
| 89                            | 0.1 | 1               |
| 139                           | 0.1 | 1               |
| 162                           | 0.1 | 1               |
| 243                           | 0.3 | 8               |
| 264                           | 0.1 | 4               |
| 293                           | 0.2 | 7               |
| 397                           | 0.2 | 8               |
| 1259                          | 0.1 | 11              |
| 1329                          | 0.2 | 29              |
| 1392                          | 0.1 | 9               |
| 3667                          | 0.1 | 27              |

**Table S6.** Frequency, S (Huang-Rhys) factor and corresponding relaxation energy for **2b** emission. Only modes with S larger than 0.1 are presented.

| Frequency (cm <sup>-1</sup> ) | S   | $\lambda$ (meV) |
|-------------------------------|-----|-----------------|
| 39                            | 0.3 | 2               |
| 50                            | 0.2 | 1               |
| 64                            | 0.2 | 2               |
| 102                           | 0.2 | 2               |
| 116                           | 0.1 | 2               |
| 176                           | 0.1 | 1               |
| 262                           | 0.5 | 17              |
| 303                           | 0.2 | 7               |
| 354                           | 0.1 | 3               |
| 362                           | 0.2 | 9               |
| 1145                          | 0.1 | 10              |
| 1250                          | 0.1 | 8               |
| 1394                          | 0.1 | 15              |
| 1648                          | 0.1 | 14              |
